# Supplementary material for: Analysis of Shielding Effectiveness against Electromagnetic Interference (EMI) for Metal-Coated Polymeric Materials
Source: MDPI journal article supplement (doi:10.3390/polym15081911), 2023-04-16
Supplement: s1 [file s1]

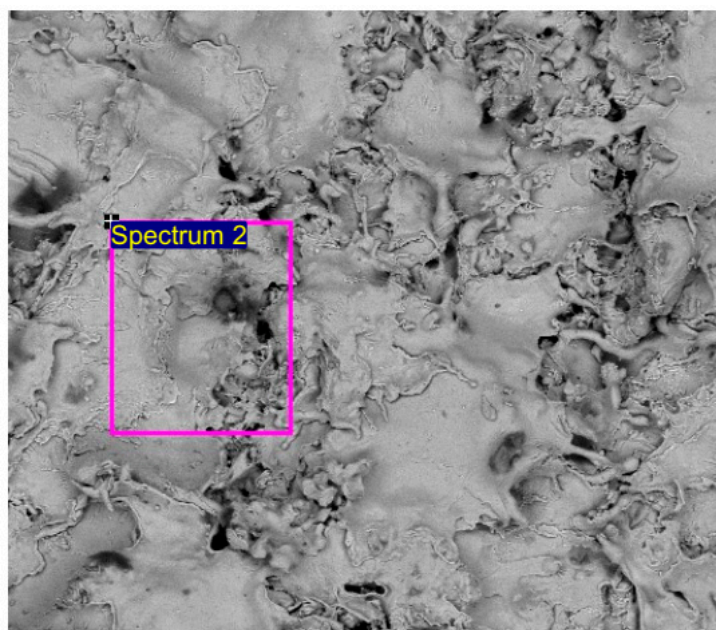

Spectrum processing :  
No peaks omitted

Processing option : All elements analyzed (Normalised)  
Number of iterations = 3

Standard :  
C CaCO3 1-Jun-1999 12:00 AM  
O SiO2 1-Jun-1999 12:00 AM  
Zn Zn 1-Jun-1999 12:00 AM

| Element | Weight% | Atomic% |
|---------|---------|---------|
| C K     | 18.49   | 51.59   |
| O K     | 4.18    | 8.76    |
| Zn K    | 77.33   | 39.65   |
| Totals  | 100.00  |         |

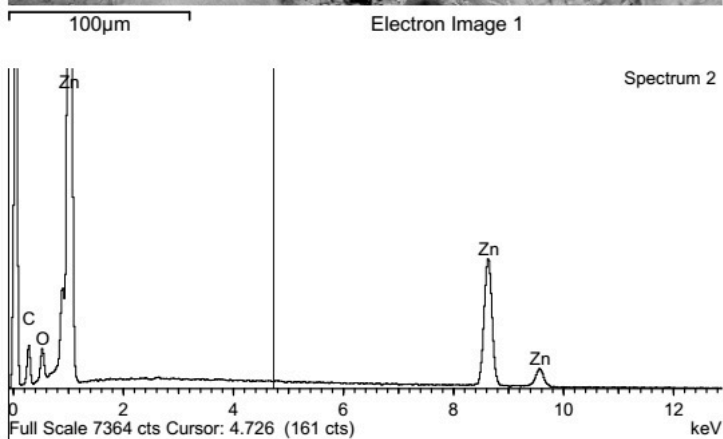

**Figure S1.** The EDAX analysis of Zinc.

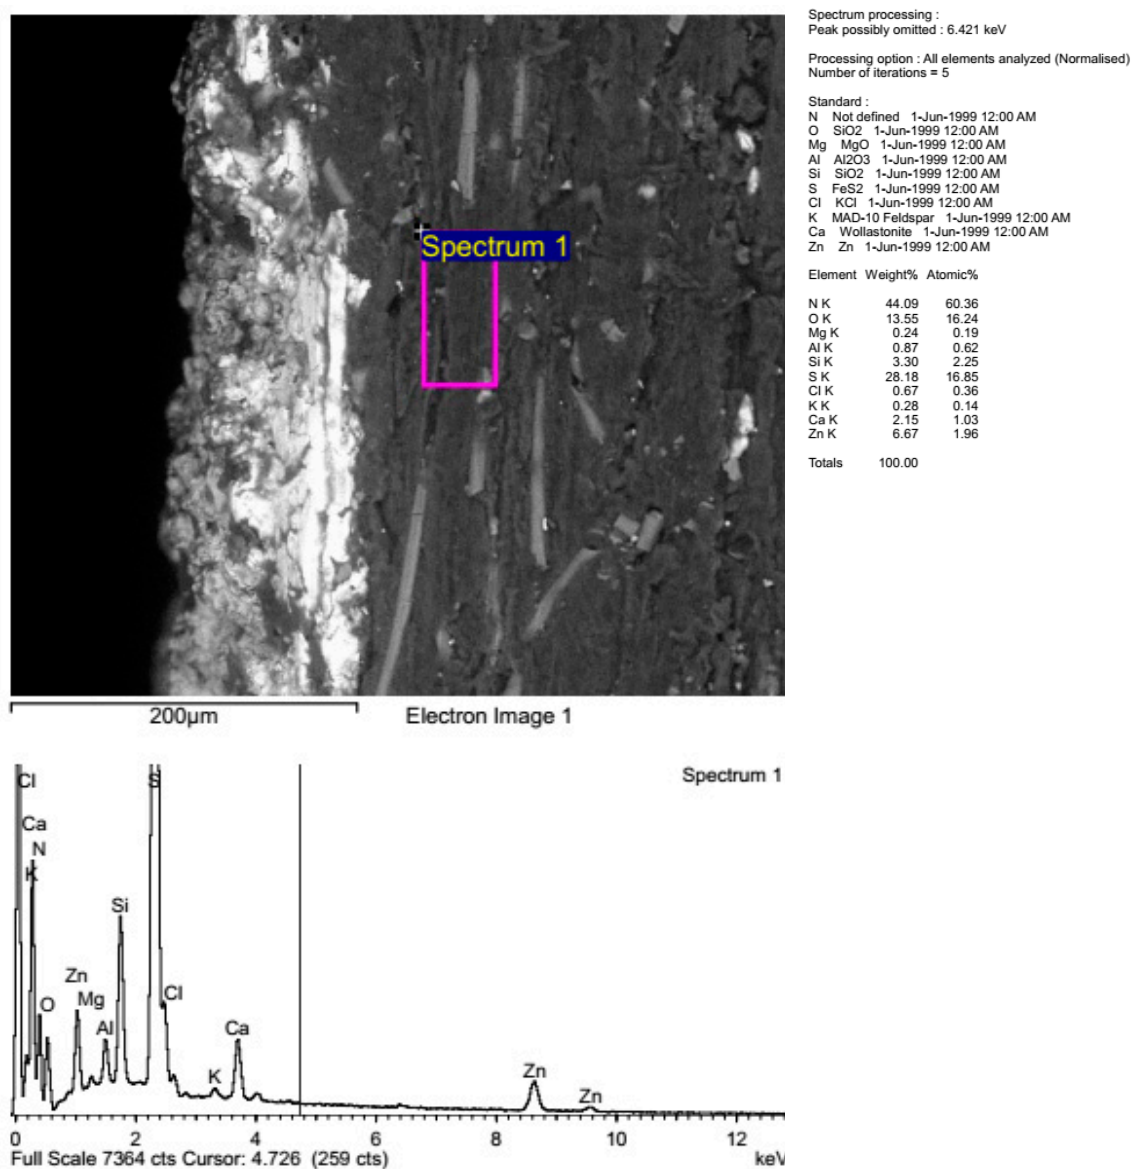

Figure S2. The EDAX analysis of PPS.

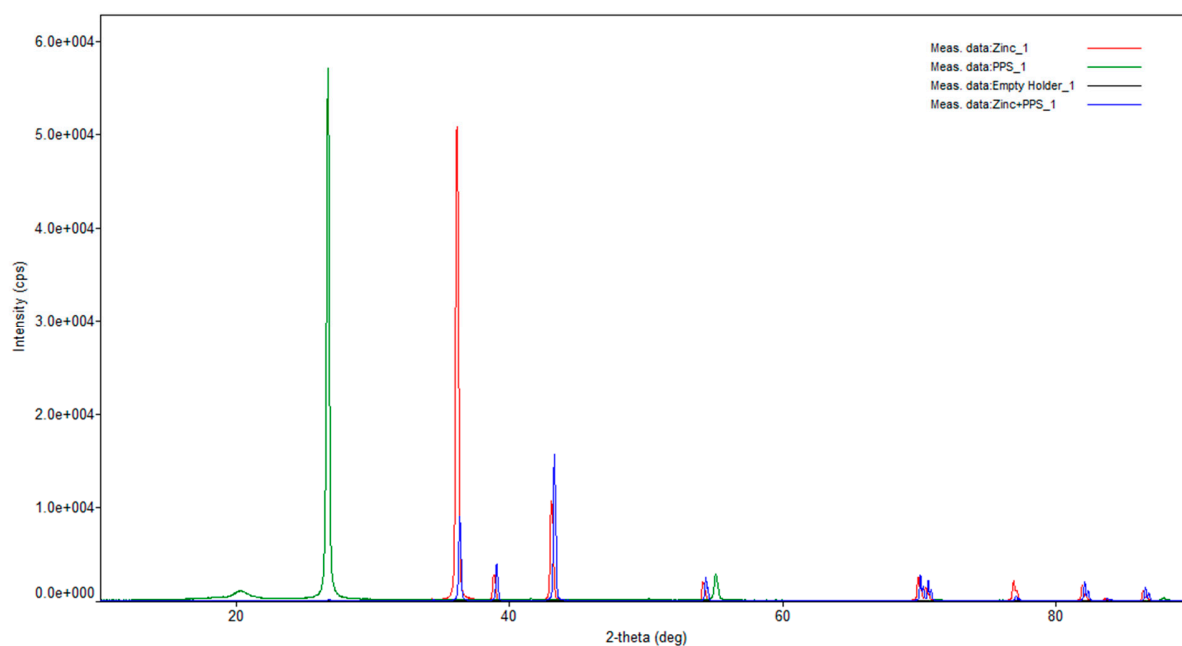

**Figure S3.** The XRD analysis of Zn\_PPS.

Table S1 shows the relative permeability, permittivity, boundary conditions, mesh quality, and frequency range of coating materials.

**Table S1.** EMI simulation parameters of coatings.

| Parameters/Sample     | Zinc       | PPS        | PEEK       | PPA        | Al-Bronze |
|-----------------------|------------|------------|------------|------------|-----------|
| Relative Permeability | 1.00021    | 1          | 1          | 1          | 1.000021  |
| Permittivity          | 3.21       | 3.21       | 3.23       | 4.3        | 3.21      |
| Boundary conditions   | Perfect E  | Perfect E  | Perfect E  | Perfect E  | Perfect E |
| Mesh quality          | Default    | Default    | Default    | Default    | Default   |
| Frequency (GHz)       | 0.01 – 1.5 | 0.01 – 1.5 | 0.01 – 1.5 | 0.01 – 1.5 | 0.01-1.5  |
|                       | GHz        | GHz        | GHz        | GHz        | GHz       |
| Step frequency (MHz)  | 7.45       | 7.45       | 7.45       | 7.45       | 7.45      |
| Excitation type       | Wave port  | Wave port  | Wave port  | Wave port  | Wave port |

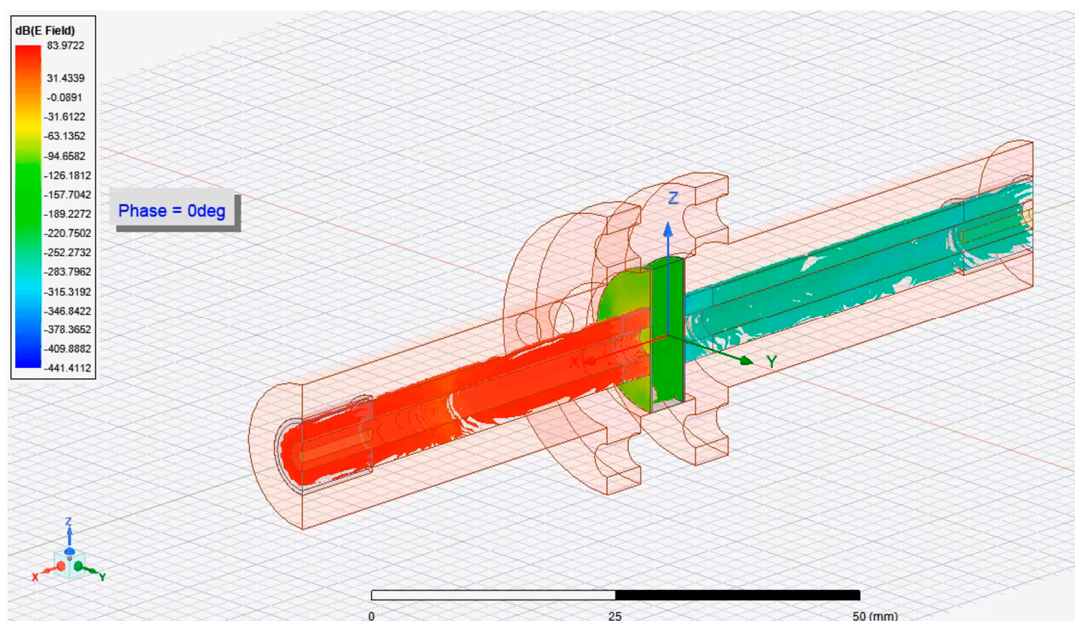

**Figure S4.** Simulation of E-Field at 1.05 GHz for PPA sample in the EMI fixture.
